# Supplementary material for: A sensitive DNA sensor based on an organic electrochemical transistor using a peptide nucleic acid-modified nanoporous gold gate electrode
Source: Royal Society of Chemistry journal article supplement (doi:10.1039/c7ra09832d), 2017-01-01
Supplement: c7ra09832d1.pdf [file c7ra09832d1.pdf]

## Supporting information

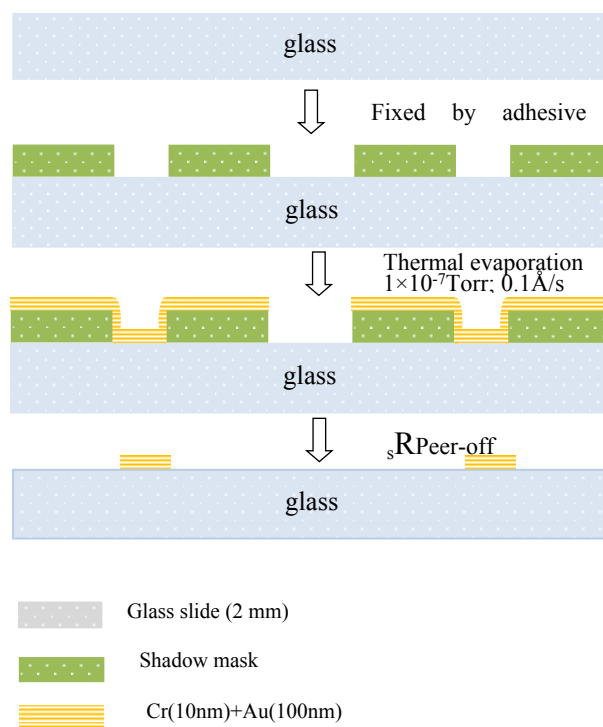

**Figure S1** Process flow for source-drain electrode fabrication

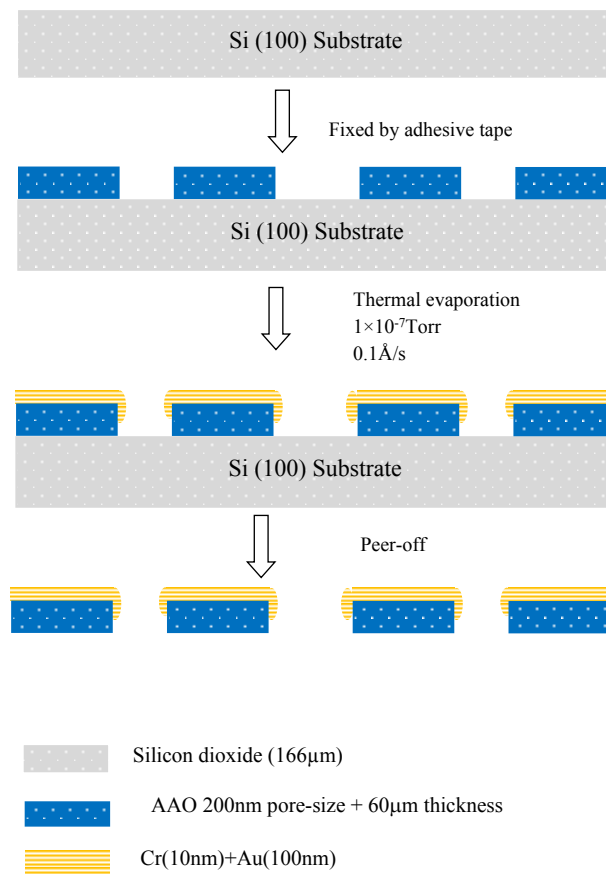

**Figure S2** Process flow for nanoporous gold gate electrode fabrication

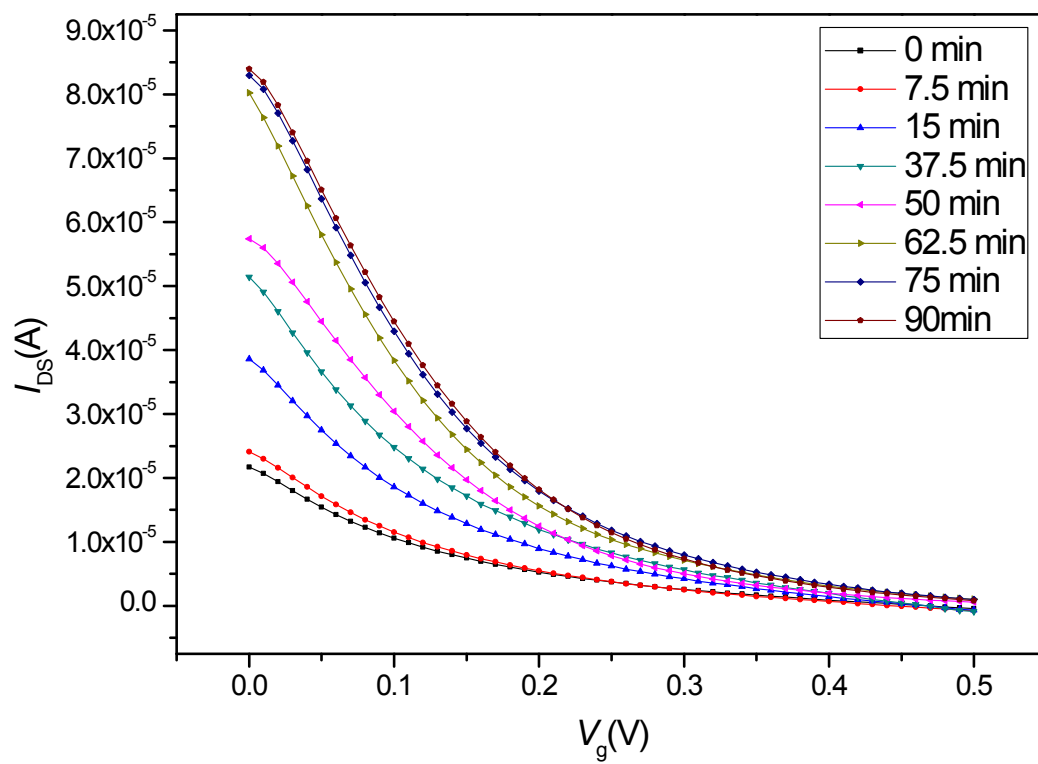

**Figure S3** Transfer characteristic curves of OEET based on nanoporous gold gate electrode in 10 mM PBS containing 50 nM C-DNA target with different hybridization time.  $V_{DS} = -0.1$  V.

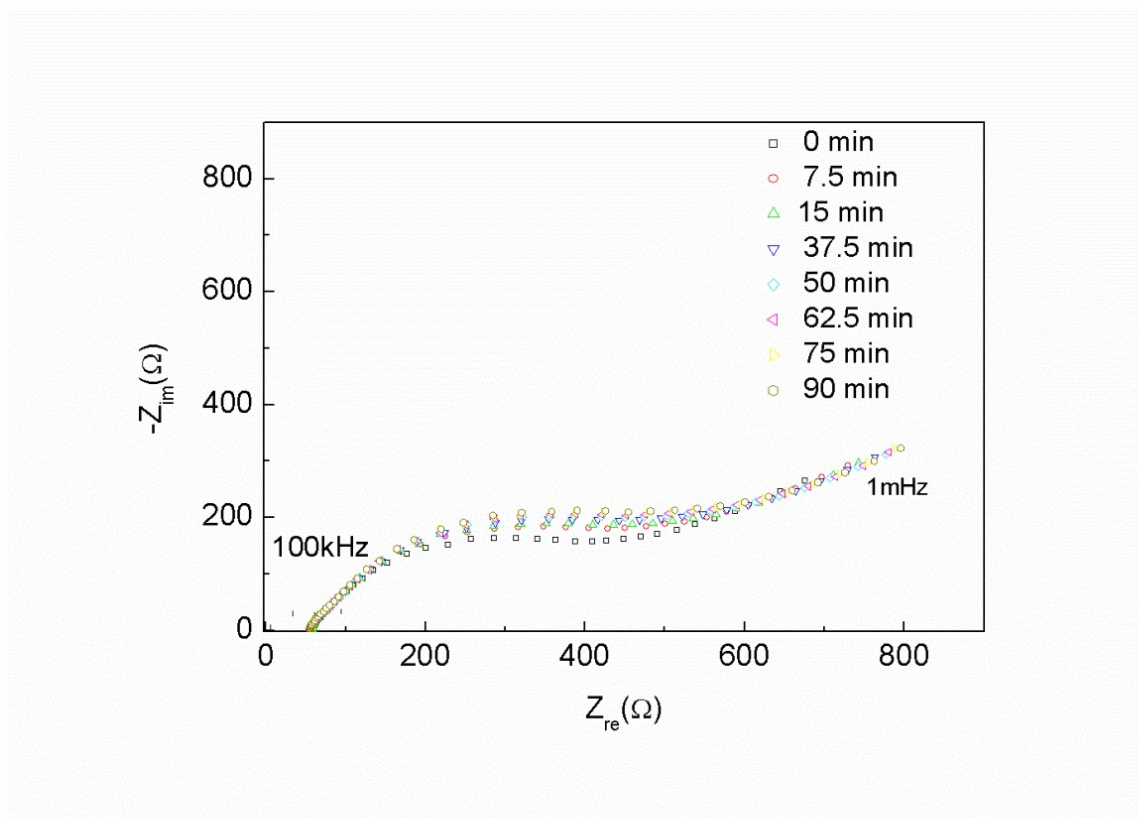

**Figure S4** Nyquist plots of PNA/DNA hybridization process on nanoporous gold electrode in the presence of 10 nM C-DNA target with different hybridization time. Buffer: 10 mM PBS. Redox probe: 1 mM  $\text{Fe}(\text{CN})_6^{3-/4-}$ .

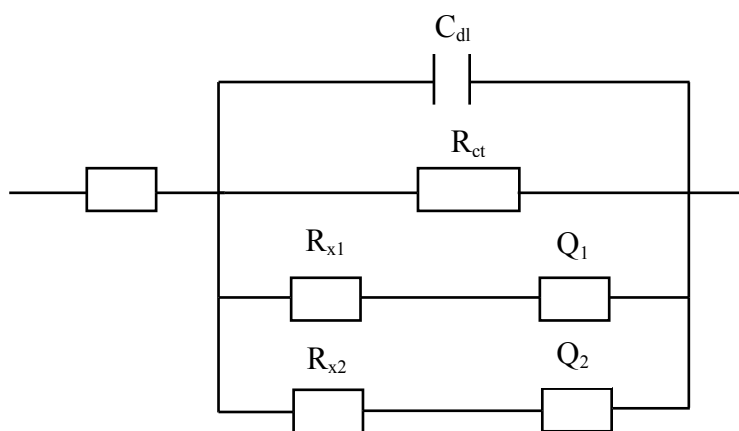

**Figure S5** Equivalent circuit model for nanoporous gold electrode.  $R_s$ , solution resistance;  $C_{dl}$ , the double layer capacitance;  $R_{x1}$ , the resistance through PNA or PNA/DNA film;  $R_{x2}$ , the pinhole/defect resistance of nanoporous gold electrode;  $Q_1$  and  $Q_2$  are constant phase elements.
